# Supplementary material
Source: publisher site journal article supplement (https://www.dovepress.com/article/400107)

Figure S1 The gene expression distribution box plots of GSE79962 and GSE54514

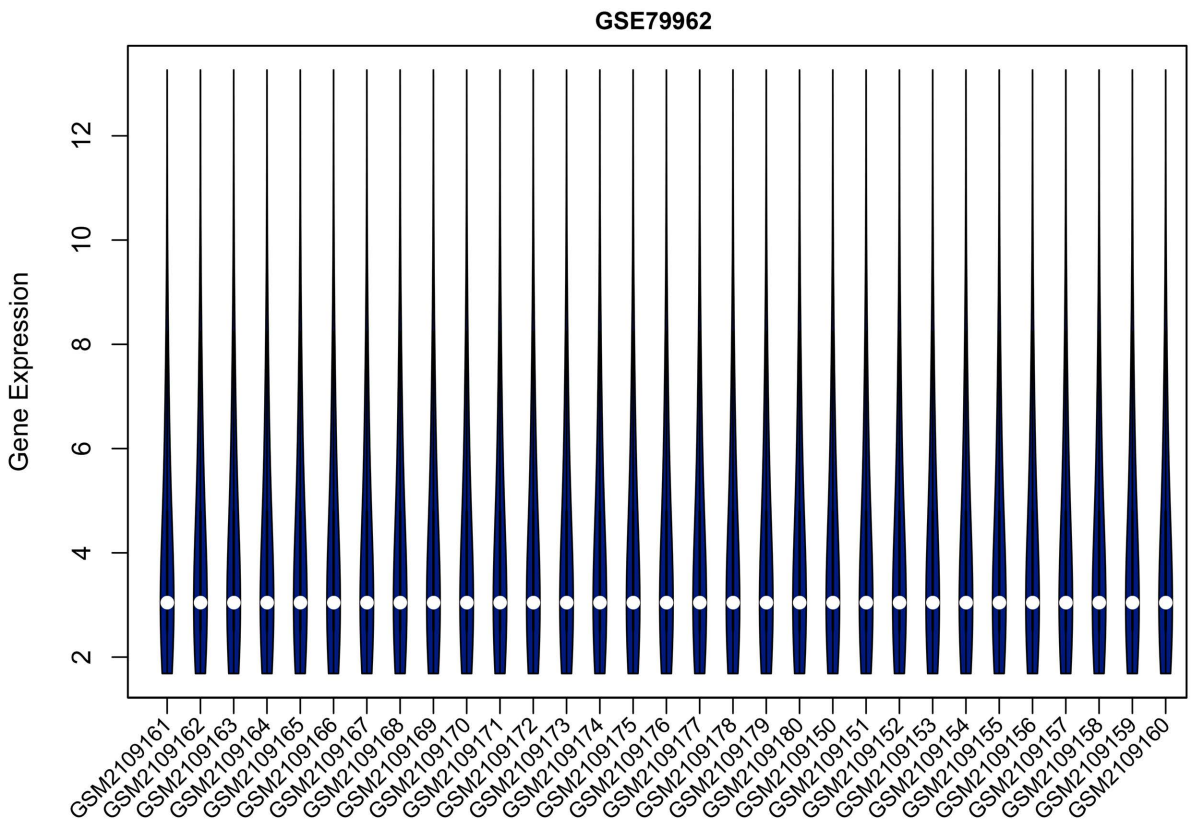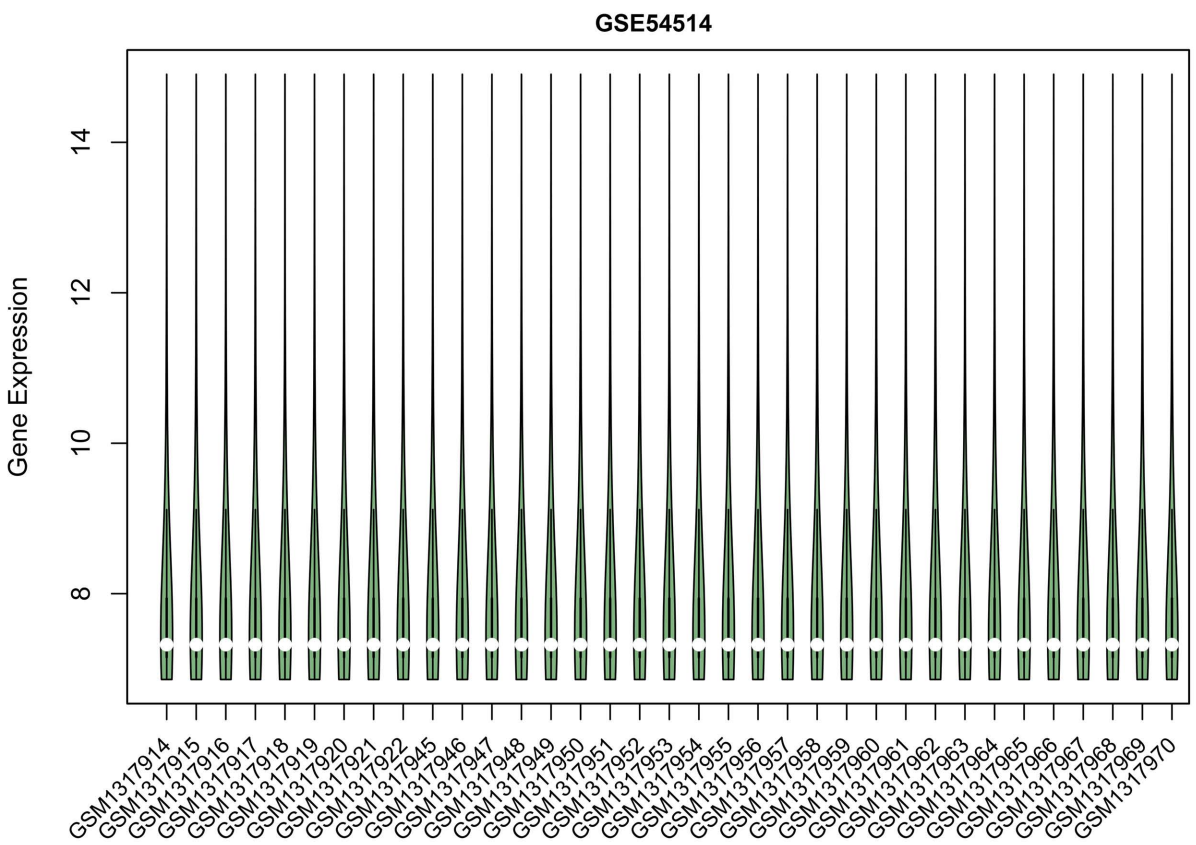

# Figure S2 GSEA of total FRG set in GSE79962

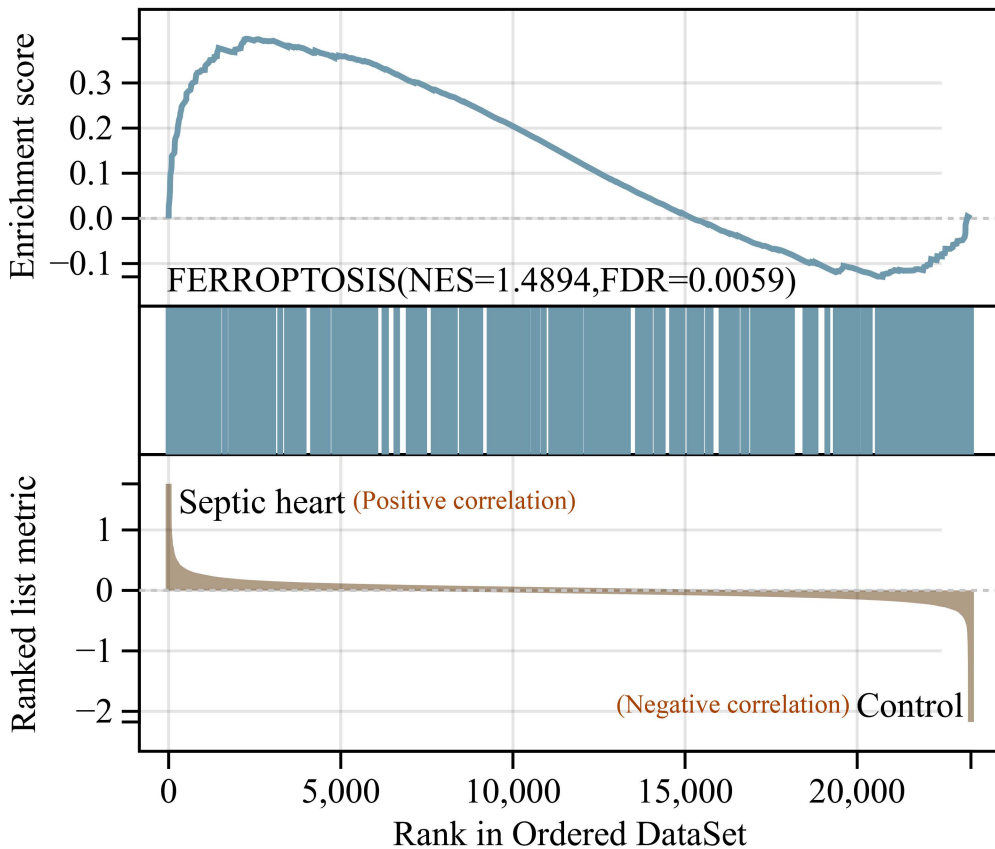

Figure S3 Clustered heatmap of DEGs in GSE79962

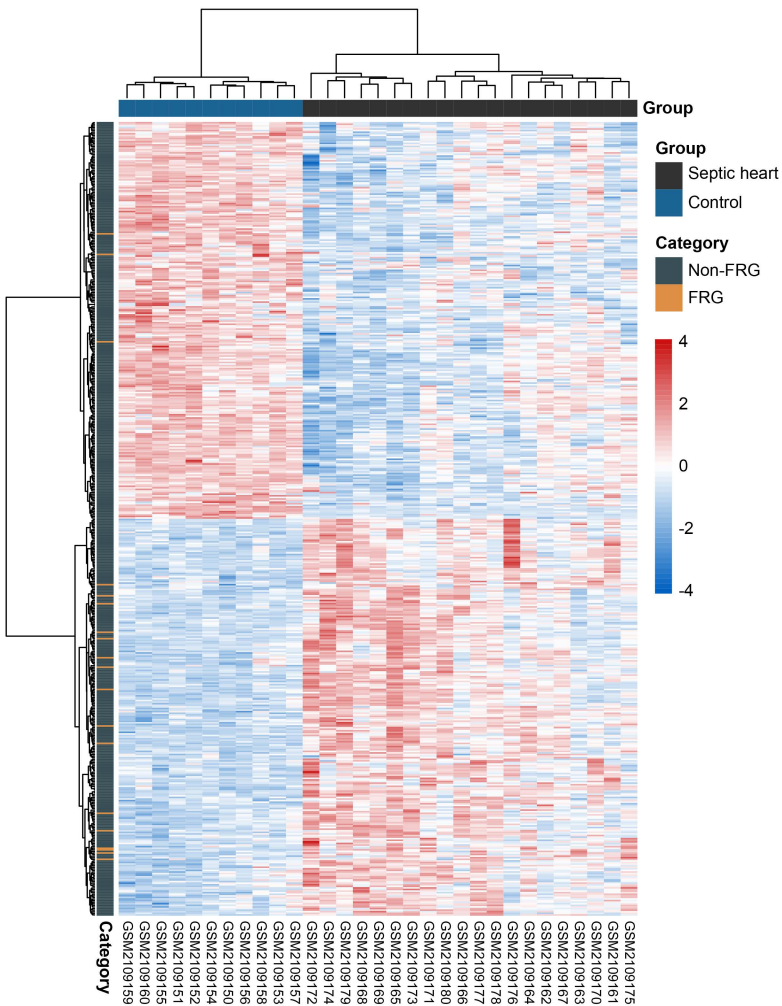

**Figure S4 Correlation of key gene expression and sepsis severity in GSE54514 (N = 35)**

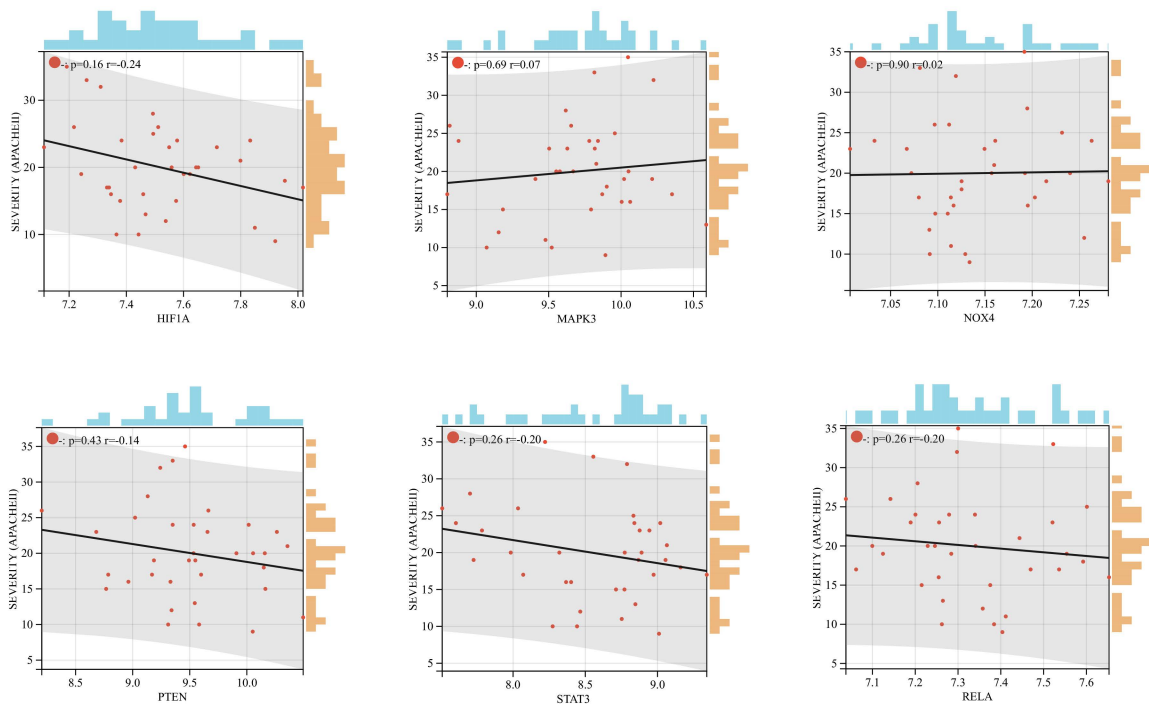

**Figure S5****(A) Correlation heatmap of infiltrating immune cells proportion in the septic hearts from the GSE79962 data set, N = 20.****(B) Linear regression plots presenting the significant correlation between key FRGs expression and DIICs proportion in GSE79962, N<sub>control</sub> = 11, N<sub>septic heart</sub> = 20.****A**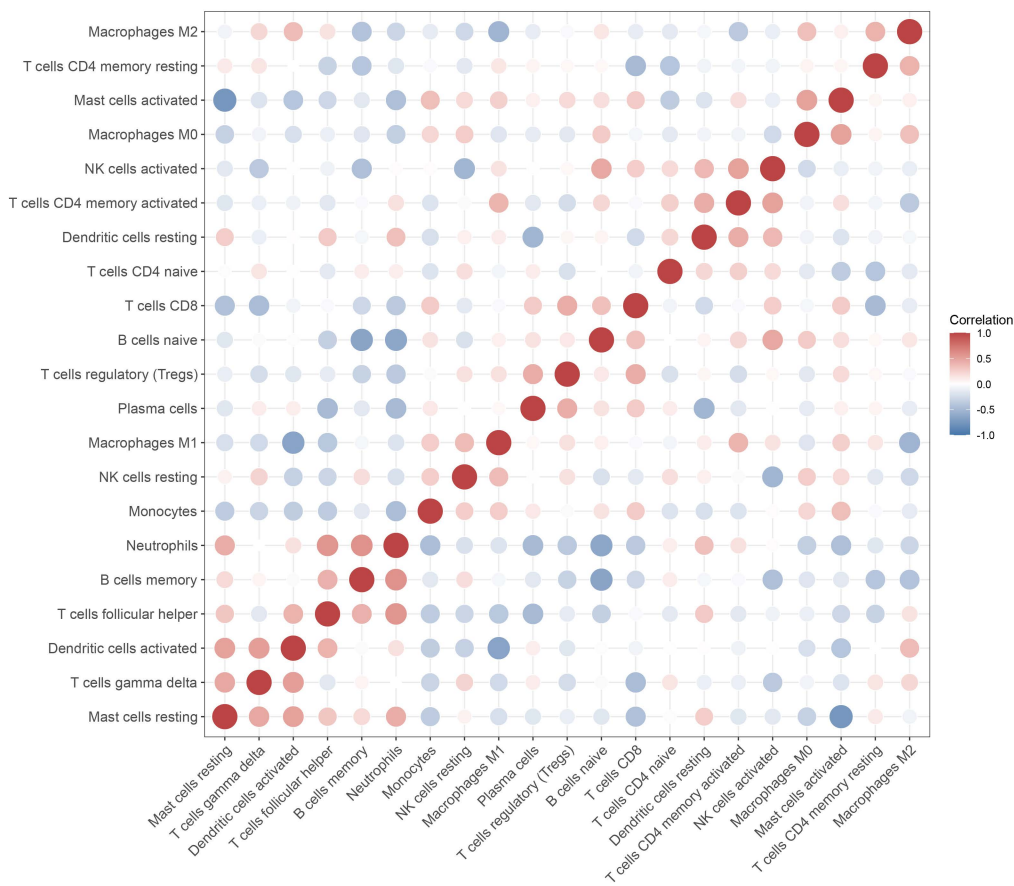**B**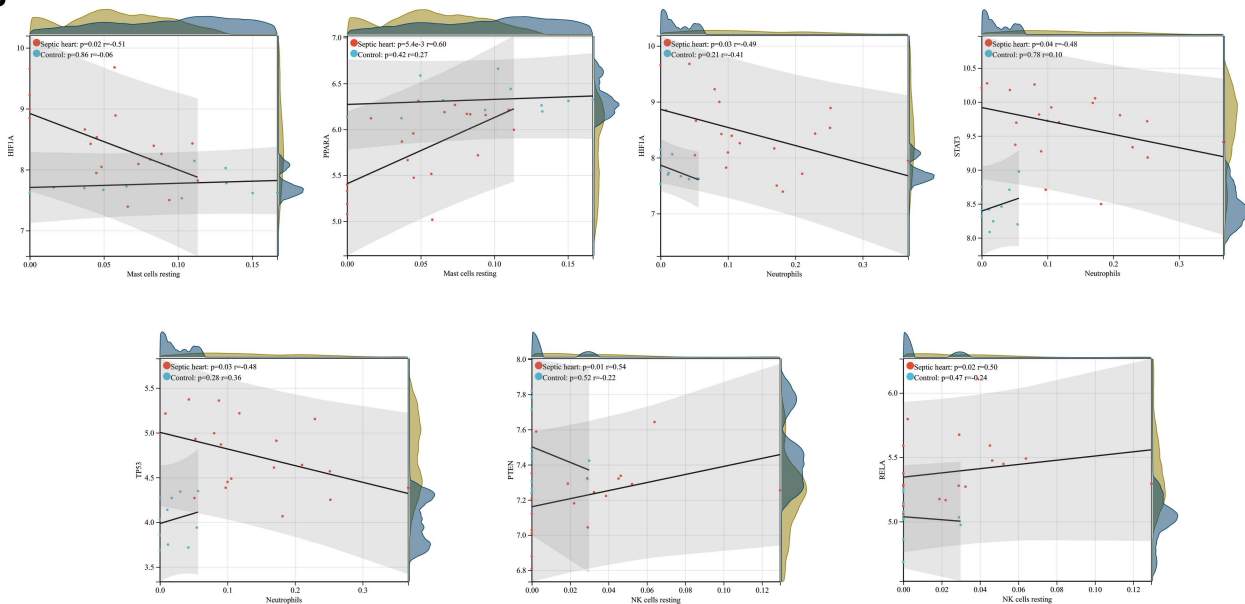

Supplement: Supplementary file 1 [file get_supplementary_file.php]
